# Comprehensive evaluation of differential serodiagnosis between Zika and dengue viral infection

Day-Yu Chao<sup>1\*</sup>, Matthew T. Whitney<sup>2</sup>, Brent S. Davis<sup>2</sup>, Freddy A Medina<sup>3</sup>, Jorge L Munoz<sup>3</sup>,  
Gwong-Jen J. Chang<sup>2\*</sup>

1. Graduate Institute of Microbiology and Public Health, College of Veterinary Medicine, National Chung-Hsing University, Taichung, Taiwan (402)
2. US Department of Health and Human Services, Public Health Services, Division of Vector-Borne Diseases, Centers for Disease Control and Prevention, Fort Collins, Colorado 80521
3. US Department of Health and Human Services, Public Health Services, Division of Vector-Borne Diseases, Centers for Disease Control and Prevention, San Juan, Puerto Rico 00920

\*Corresponding author: Chang, Gwong-Jen J

Email: gxc7@cdc.gov

Tel: 970-221-6497

or

Day-Yu Chao

Email: dychao@nchu.edu.tw

Tel: 886-4-22840694

**Keywords:** Zika, Dengue, MAC-ELISA, Differential diagnoses

**Running headline:** differential serodiagnosis of Zika and dengue

24 Word counts: 250 (abstract); 3499 (text)

25

## 26 **Summary**

27 Diagnostic testing for Zika virus (ZIKV) or dengue virus (DENV) infection can be accomplished by a  
 28 nucleic acid detection method; however, a negative result does not exclude infection due to the low virus  
 29 titer during infection depending on the timing of sample collection. Therefore, a ZIKV- or DENV-  
 30 specific serological assay is essential for the accurate diagnosis of patients and to prevent potential  
 31 severe health outcomes. A retrospective study design with dual approaches of collecting human serum  
 32 samples for testing was developed. All serum samples were extensively evaluated by using both non-  
 33 infectious virus-like particles (VLPs) and soluble non-structural protein 1 (NS1) in the standard  
 34 immunoglobulin M (IgM) antibody-capture enzyme-linked immunosorbent assay (MAC-ELISA). Both  
 35 VLP- and NS1-MAC-ELISAs were found to have similar sensitivity for detecting anti-  
 36 premembrane/envelope and NS1 antibodies from ZIKV-infected patient sera. Group cross reactive  
 37 (GR)-antibody-ablated homologous fusion peptide-mutated (FP)-VLPs consistently showed higher P/N  
 38 values than homologous wild-type VLPs. Therefore, FP-VLPs were used to develop the algorithm for  
 39 differentiating ZIKV from DENV infection. Overall, the sensitivity and specificity of the FP-VLP-  
 40 MAC-ELISA and the NS1-MAC-ELISA were each higher than 80% with no statistical significance. A  
 41 novel approach to differentiate ZIKV from DENV infection serologically has been developed. The  
 42 accuracy can reach up to 95% when combining both VLP and NS1 assays. In comparison to current  
 43 guidelines using neutralization tests to measure ZIKV antibody, this approach can facilitate laboratory  
 44 screening for ZIKV infection, especially in regions where DENV infection is endemic and capacity for  
 45 neutralization testing does not exist.

46

47

## 48 Introduction

49 Zika virus (ZIKV) and dengue virus (DENV), members of the *Flaviviridae* family, are  
 50 associated with the resurgence of mosquito-transmitted diseases worldwide.<sup>1</sup> While DENV continues to  
 51 impose a great economic and public health burden in tropical and subtropical countries, the recent  
 52 emergence of ZIKV, circulated in Central and South America since 2013, has resulted in terrifying  
 53 outbreaks with severe health outcomes, including Guillain-Barre syndrome in adults as well as  
 54 microcephaly, congenital neurologic malformations, and fetal demise in fetuses.<sup>2,3</sup> Clinically, ZIKV and  
 55 DENV share similar symptoms of infection, geographical distribution, and transmission cycles between  
 56 humans and *Aedes aegypti* mosquitoes.<sup>4</sup> A confirmatory diagnosis can be attained by virus isolation or  
 57 viral RNA detection in serum and other body fluids, but given the low virus titer during ZIKV infection  
 58 and the high incidence of mild or asymptomatic ZIKV infections, a ZIKV-specific serological assay is  
 59 essential to accurately diagnosis the patients who were negative by virus isolation or viral RNA  
 60 detection.<sup>5,6</sup>

61  
 62 Mosquito-borne flaviviruses can be serologically classified into several complexes, including  
 63 medically important members of the Japanese encephalitis virus (JEV) complex, (DENV), yellow fever  
 64 virus (YFV), as well as the recently emerged ZIKV.<sup>7</sup> During natural infection, the majority of elicited  
 65 antibodies (Abs) recognize structural proteins pre-membrane (prM) and envelope (E), and non-structural  
 66 protein 1 (NS1).<sup>7,8,9</sup> Anti-E antibodies that recognize all members of the flavivirus group, members  
 67 from different serocomplexes, or members within a serocomplex, are classified as group-reactive (GR),  
 68 complex-reactive (CR), or type-specific (TS)-Abs, respectively.<sup>10,11,12</sup> Although GR or CR anti-NS1  
 69 antibodies could be found from other flavivirus infections, recent studies suggested the majority of anti-  
 70 NS1 antibodies from primary ZIKV infections are dominated by TS Abs and can be used as serological  
 71 markers to differentiate ZIKV from DENV infections.<sup>8,13</sup> However, the cross-reactivity of human anti-

72 NS1 antibodies increased after sequential DENV and ZIKV infections.<sup>8</sup> Furthermore, the low sensitivity  
 73 in detecting anti-NS1 antibodies and the discrepancy in determining sero-positivity between detecting  
 74 anti-E and anti-NS1 antibodies were continuously reported.<sup>14, 15</sup> Serological cross-reactivity between  
 75 flaviviruses is common and several recent publications have shown the global efforts trying to resolve  
 76 this issue to determine the status of ZIKV infection.<sup>13, 16, 17, 18</sup> Although a validated, virus specific sero-  
 77 diagnostic test is urgently needed, a rigorous evaluation of the assay is required to ensure optimal patient  
 78 care and accurate epidemiologic surveillance in regions with active transmission of both DENV and  
 79 ZIKV.

80

81 The objectives of this study were to develop (Phase I) and validate (Phase II) a sero-diagnostic  
 82 assay that can reliably distinguish and diagnose current/acute ZIKV and/or DENV infection in humans.  
 83 In the Phase I, we selected and applied several well-characterized, archived serum panels, collected  
 84 during the 2008 West Nile virus outbreak in South Dakota, the 2009 DENV outbreak in Brazil and the  
 85 2016 introduction of ZIKV to Puerto Rico, to thoroughly evaluate anti-prM/E and anti-NS1 IgM  
 86 antibodies against ZIKV and DENV virus-like particles (VLP) and soluble NS1 antigens. We applied  
 87 the Receiver Operation Characteristic (ROC) analysis to estimate the proper cut-off and to determine an  
 88 algorithm that can specifically distinguish and diagnose ZIKV and DENV infection using  
 89 acute/convalescent human serum specimens. We then conducted a double-blind study using clinical  
 90 serum specimens collected and provided by Division of Vector-borne Disease (DVBD)-Dengue Branch,  
 91 Centers for Disease Control and Prevention (CDC), in Puerto Rico to validate the reliability of the  
 92 algorithm developed in Phase I. Using the classical immunoglobulin M (IgM) antibody-capture enzyme-  
 93 linked immunosorbent assay (MAC-ELISA), we were able to differentiate between ZIKV and DENV  
 94 with accuracy higher than 85%. Furthermore, combining both VLP and NS1-MAC-ELISAs, 95%  
 95 accuracy could be achieved.

## 96 **Materials and Methods**

### 97 **Study design and human serum panels**

98 A two-stage retrospective study design was implemented here including a developmental serum  
 99 panel in Phase I and a validation panel in Phase II. Serum specimens of all suspected DENV- or ZIKV-  
 100 infected patients were evaluated by real-time reverse-transcription polymerase chain reaction (rRT-PCR)  
 101 for acute-stage specimens and MAC-ELISA for IgM seroconversion of the convalescent-phase  
 102 specimens by the CDC Dengue Branch in San Juan, Puerto Rico.<sup>19</sup> Since there was a possibility of IgM  
 103 antibody cross-reactivity between closely related flaviviruses from prior flaviviral infections or  
 104 vaccination, a supplementary focus-reduction micro-neutralization test (FR<sub>μ</sub>NT) was conducted for all  
 105 specimens positive by MAC-ELISA. FR<sub>μ</sub>NT is still the only reference standard test by far for  
 106 differentiating flavivirus infection serologically.

107 The retrospective, archived serum panels (summarized in Table 1) were used as developmental  
 108 panels in Phase I to establish the proper cut-off value for the assay and algorithm. Only the ZIKV-  
 109 infected patient serum panel (the testing panel, Table S3) was collected in Puerto Rico after the first  
 110 confirmation of ZIKV circulation in the Americas; the rest of the archived specimens were collected  
 111 prior to the first appearance of ZIKV in the Americas. The ZIKV patient serum panel used for testing  
 112 included forty-two acute and convalescent ZIKV-infected patient serum pairs from Puerto Rico in 2016,  
 113 confirmed by rRT-PCR and CDC MAC-ELISA. Acute specimens were collected within seven days and  
 114 the convalescent phase specimens were taken within seven to thirty days after onset of symptoms. The  
 115 ninety percent end-point FR<sub>μ</sub>NT (FR<sub>μ</sub>NT<sub>90</sub>) on ZIKV and DENV-2 was used to verify recent infections  
 116 by following the CDC guidelines.<sup>20</sup> Primary ZIKV infection is determined by an anti-DENV-2 FR<sub>μ</sub>NT<sub>90</sub>  
 117 titer of less than 20 from both acute and convalescent sera with a concurrent positive ZIKV titer ( $\geq 20$ ).  
 118 Secondary ZIKV infection is defined by a positive ZIKV titer with an anti-DENV-2 titer of equal to or  
 119 greater than 20 from either acute or convalescent sera.

A double-blinded test of VLP- and NS1-MAC-ELISA were conducted in Phase II to validate the established diagnostic algorithm (Table S5). Serum specimens used in this Phase were all collected from Puerto Rico based on convenient series, with only single serum collection from each participant. This study was conducted and reported in accordance with the Standards for Reporting Diagnostic Accuracy Studies (STARD) guidelines.<sup>21</sup> Informed consent documents for all eligible participants were waived based on the protocol number 6874. An institutional review board (IRB) waiver to use this serum panel for research purposes was approved by the CDC-human studies review board. Since all the specimens were de-identified, the basic demographic and clinical characteristics of the participants were not available in this study.

### **Plasmid construction, soluble protein expression and antibody production**

A transcriptional and translational optimized eukaryotic cell expression plasmid was used as the backbone to express NS1 protein or pre-membrane/envelope (prM/E) that generate VLPs from ZIKV BPH-2016 strain (Brazil 2016) based on standard molecular cloning procedures as described previously.<sup>22, 23</sup> The constructed plasmids were electroporated into COS-1 cells using a protocol described previously. VLPs and soluble nonstructural protein 1 (sNS1) were expressed by COS-1 cells electroporated with recombinant expression plasmids encoding the prM/E and NS1 genes, respectively. Electroporated cells were recovered in 150 cm<sup>2</sup> culture flasks with 50 ml DMEM and incubated at 28°C with 5% CO<sub>2</sub> for VLP/sNS1 expression. VLPs and sNS1 from DENV-2 strain 16681, DENV-3 strain C0331/94, and West Nile virus (WNV) strain NY99 were produced as described previously<sup>22, 23</sup> and used in this study. Additionally, the prM/E expressing plasmid was modified by site-directed mutagenesis of an epitope recognized by GR antibody<sup>24</sup> and the VLPs generated were named ZIKV-FP-VLP or DENV2-FP-VLP.

Both the anti-ZIKV polyclonal rabbit and mouse sera containing high-titer immunoglobulin recognizing all potential antigenic epitopes were generated at the Centers for Disease Control and Prevention, Fort Collins, U.S.A. (US-CDC). Anti-DENV-2, DENV-3, or WNV VLP, and anti-NS1 polyclonal rabbit sera were produced in-house as described previously. Murine hyperimmune ascetic fluid (MHIAF) specific for DENV-2 or DENV-3, or WNV were obtained from the Diagnostic and Reference Laboratory, DVBD-CDC.

# **VLP- and NS1-specific MAC/GAC-ELISAs**

Human serum specimens were assayed for the presence of prM/E- and NS1-specific antibodies using MAC- ELISAs as previously described.<sup>14, 20, 22, 23</sup> Briefly, 96-well plates were coated with goat anti-human IgM or IgG (Kirkegaard & Perry Laboratories, Gaithersburg, MD) diluted 1:2,000 in PBS at pH 9.0 and incubated at 4°C overnight. The infected patient serum as well as negative control serum were diluted 1:1,000 in wash buffer (PBS with 0.05% Tween-20), 50 µl were added to wells, and incubated at 37°C for 60 min. ZIKV, DENV, WNV VLPs and NS1, pre-determined and standardized at an optical density of 1.0 at 450nm (OD<sub>450</sub>), by antigen-capture ELISA (Ag-ELISA), were diluted in wash buffer and tested against each serum sample in triplicate.

To deplete anti-prM/E antibodies from serum samples, Ag-ELISA was used to capture VLP immune-complexes in 96-well plates as previously suggested.<sup>22, 23</sup> In brief, the patient and negative control sera were diluted 1:1,000 in PBS, mixed with VLP antigens, and added immediately to wells pre-coated with anti-prM/E rabbit sera and incubated at 37°C for 60 min. A total of 50 µL of prM/E antibody-depleted sera were transferred to 96-well plates pre-coated with anti-human IgM for performing the NS1-specific MAC-ELISA as described above.



## 166 **Data processing and statistical analysis**

167 Both positive and negative values were determined as the average OD<sub>450</sub> from triplicate samples of  
 168 each specimen (P) or normal human control sera (N) reacting with VLP or NS1 antigens, respectively.  
 169 Positive-to-negative (P/N) ratios were derived for each specimen as well as positive and negative serum  
 170 controls on each plate for validation of the quality of the assay. The P/N ratios from the ZIKV patient  
 171 sera were compared with the ratios from different serum specimens from the test panel and the positive  
 172 likelihood ratio (LR+), shown as ROC curve, was calculated by dividing sensitivity by 1-specificity to  
 173 determine the optimal cutoff value of P/N ratios from VLP- and NS1-MAC-ELISAs.

174 The Bland-Altman plot was used to measure the consistency of higher P/N values of the ZIKV- over  
 175 DENV2-FP-MAC-ELISA, or ZIKV- over DENV2-NS1-MAC-ELISA by plotting the ratios of the two  
 176 methods' P/N ratio values (ratio of P/N value between ZIKV-MAC-ELISA and DENV2-MAC-ELISA)  
 177 versus the averages of P/N values from both methods. Two-by-two contingency tables were prepared to  
 178 determine the sensitivity, specificity, positive predictive value (PPV) and negative predictive value  
 179 (NPV) of the assays based on the algorithm generated in this study according to the validation serum  
 180 panel. For all statistical analyses, we used GraphPad Prism version 6 and *p* values less than 0.05 were  
 181 considered statistically significant.

## 182 **Results**

### 183 **Participant serum panels**

184 Figure 1 showed the flowchart of the archived serum panel retrospectively collected for Phase I  
 185 and Phase II study. Since the first index patient reported onset of symptoms on November 23, 2015,  
 186 Puerto Rico became the first U.S jurisdiction to report local transmission of ZIKV when DENV was  
 187 already endemic in Puerto Rico. In order to proper establishment of the cut-off value of the assay, the  
 188 criteria of all ZIKV and DENV-confirmed specimens used in Phase I included paired sera collected  
 189 during the acute and convalescent phase of illness and confirmation of disease status by FRμNT<sub>90</sub> on  
 190 ZIKV and DENV-2.

191 Detail characteristics of four groups of well-characterized, archived patient serum specimens  
 192 used in Phase I were outlined in Table 1. To meet the outbreak reality when the paired specimens were  
 193 difficult to obtain, the only criteria for the serum panel used in Phase II was double-blinded. All DENV  
 194 positive specimens were collected during 2010-2012 when the paired specimen from the same patient  
 195 was rare. The negative specimens were taken during 2016 and they are all negative for DENV, ZIKV,  
 196 and Chikungunya virus (CHIK) in acute phase and negative for IgM in convalescent phase samples.

### 198 **Establishment of ZIKV NS1-MAC-ELISA**

199 IgM antibody-capture ELISA has traditionally been used to selectively detect the IgM antibodies  
 200 and to avoid the competition between IgM and IgG for a specific target antigen (such as prM/E  
 201 containing flavi-VLP antigens). This is in contrast of using E or NS1 antigens for direct detection of  
 202 anti-E or anti-NS1 antibodies in other studies.<sup>18, 25, 26, 27</sup> The use of VLPs in MAC-ELISA has good  
 203 sensitivity, safety, and acceptable specificity for determining a current flaviviral infection and was  
 204 chosen here. Based on our previous publications<sup>22</sup>, depletion of anti-prM/E antibodies in advance is

necessary to detect flavivirus-specific anti-NS1 antibodies using MAC-ELISA. To confirm if this is true for ZIKV infection, ZIKV-infected patient sera were added to pre-coated ELISA plates with or without depletion of prM/E antibodies. As shown in Fig 2A, depletion of anti-prM/E antibodies significantly enhanced the sensitivity of detecting anti-NS1 antibodies.

Since ZIKV and DENV co-circulate in the same geographic location, we determined if a combination of multiple flavivirus VLPs could be required for depletion when the status of infection from the patient serum is unknown. As shown in Fig 2B, using a single serotype of DENV VLP could potentially result in a false negative result if infection from a different serotype of DENV occurred, which is consistent with our previous publication.<sup>22</sup> Although using the combination of VLPs from ZIKV, DENV-2 and DENV-3 slightly decreased the P/N ratio from ZIKV serum panel, significantly increase the P/N ratio from DENV serum panel was noticed. Our results showed that the combination of VLPs from ZIKV, DENV-2, and DENV-3 was the best antigen combination to deplete the dominant flavivirus VLP-antibodies for the detection of NS1 antibodies against ZIKV- or DENV-infected patient serum specimens.

## **Cross-reactivity of anti-prM/E and anti-NS1 antibodies**

In order to compare the cross-reactivity of anti-prM/E and anti-NS1 antibodies, the proper cut-off values for VLP- and NS1-MAC-ELISAs were determined using a well-characterized control serum panel. Fig 3A shows the results of a ZIKV-VLP-MAC-ELISA for four different serum panels including antibodies to ZIKV, WNV, DENV and others (including other flaviviruses). Significant elevation of the P/N ratio in the convalescent phase sera was observed for patient antisera from both ZIKV and DENV infections. WNV and other anti-serum panels have little cross-reactivity with ZIKV-VLP, and were used to determine the cut-off values for the ZIKV-VLP-MAC-ELISA. The ROC analysis in Figure 3B,

showing the curve of sensitivity vs 100-specificity, provides information on how strongly a given test result can be used to predict the likelihood of evidence of infection or non-infection based on P/N values from forty-two ZIKV patient sera and the WNV/other control serum panels (Fig 3B). The optimal cutoff values of P/N ratios for both ZIKV-VLP-MAC-ELISAs of acute and convalescent phase sera were set at 2.837 and 2.76, respectively (Fig. 3C). Similarly, the results of ZIKV-NS1-MAC-ELISAs for four different serum panels are shown in Fig 4A. The optimal cutoff values of P/N ratios for ZIKV-NS1-MAC-ELISAs of both acute and convalescent sera were set at 1.014 and 1.136, respectively (Fig. 4B and 4C).

Based on the cutoff, similar percentages of ZIKV acute (69.6% and 69.6%), and convalescent sera (94.7% and 100%) were positive for both ZIKV-VLP and NS1-MAC-ELISA, respectively (Table 2). However, significant numbers of the DENV panel were also positive to ZIKV VLP (63.6%) and NS1-MAC-ELISAs (72.7%). When ZIKV serum specimens were tested against DENV2 VLP and NS1 antigens, 95.7% were positive to VLP but only 8.7% were positive to NS1 from acute phase sera. On the contrary, 100% and 52.6% of the convalescent phase sera were positive for VLP and NS1 antigens of DENV-2, respectively. In summary, our VLP- and NS1-MAC-ELISAs have similar sensitivity detecting anti-prM/E and NS1 antibodies from ZIKV-infected patient sera. Although a significantly lower percentage of ZIKV patient sera was positive to NS1 antigens than VLP of DENV-2, no difference of cross-reactivity to ZIKV antigens was observed for DENV patient sera.

## Using ZIKV/DENV2 ratio to differentiate between ZIKV and DENV infection

Previous studies suggested that a significant proportion of anti-E antibodies were GR antibodies that recognized the highly conserved fusion peptide during flavivirus infection.<sup>24, 28</sup> To avoid the binding of such GR antibodies on the ZIKV VLP, a fusion peptide mutant ZIKV VLP (ZIKV FP-VLP) was

generated for MAC-ELISA and the proper cutoff value was determined (Fig S1). A significant decrease of the cross-reactivity to ZIKV FP-VLP among the DENV serum panel was noticed; in addition, a similar positive proportion among the ZIKV serum panel was detected (Table S1). Therefore, our data suggested that FP-VLP, compared to WT-VLP as a diagnostic reagent, would be a more specific antigen for detecting anti-prM/E antibodies although there were still nearly 40% of DENV sera cross-reactive with ZIKV FP-VLP.

Further comparing the P/N ratios of the MAC-ELISA between ZIKV and DENV-2 FP-VLP, consistently higher values were observed when using homologous antigens; that is, for a ZIKV infection, higher values of the P/N ratio was observed for ZIKV FP-VLP than for the use of DENV-2 FP-VLP (Fig 5). Similar results were also observed for the NS1-MAC-ELISA. Therefore, an algorithm of serological diagnosis to differentiate between ZIKV and DENV infection was developed in this study (Fig 6).

### **Validation of the algorithm**

The prospectively collected validation serum panel was provided to the investigator and blind tested by VLP-MAC-ELISA and NS1-MAC-ELISA using FP-VLP and NS1 from ZIKV and DENV-2 and the results were interpreted based on the developed algorithm in Fig 6. Twenty (100%) of the ZIKV-confirmed sera were classified as ZIKV infection by FP-VLP-MAC-ELISA and 80% by NS1-MAC-ELISA. For DENV-confirmed specimens, 75% and 100% were classified as DENV infection by FP-VLP-MAC-ELISA and NS1-MAC-ELISA, respectively. Fifteen percent of the negative specimens were falsely classified as positive by FP-VLP-MAC-ELISA and 10% by NS1-MAC-ELISA. Overall, the sensitivity and specificity of FP-VLP-MAC-ELISA and NS1-MAC-ELISA based on the algorithm was higher than 80% with no statistical significance, although slightly lower sensitivity (75%) of FP-VLP-

MAC-ELISA in classifying DENV infection (Table S2) was observed. The overall PPV of both assays for diagnosis of ZIKV or DENV infection demonstrates no statistical significance.

275

## 276 Discussion

277 So far, no publications have evaluated anti-E or anti-NS1 antibodies against DENV or ZIKV  
278 simultaneously using well-archived human serum samples. In this study, we comprehensively evaluated  
279 the cross-reactivity of anti-prM/E antibodies induced by ZIKV infection using wild-type and FP-mutated  
280 VLP antigens from ZIKV and DENV-2. The test results were compared to the prM/E antibody-depleted  
281 NS1 MAC-ELISA. Using ZIKV-FP-VLP significantly reduced the observed cross-reactivity for a  
282 DENV patient serum panel, compared to using wild-type ZIKV VLP. Although ZIKV-NS1-MAC-  
283 ELISA is more specific in determining ZIKV infection, we still observed 57.1% cross-reactivity for  
284 ZIKV infection and 90.9% for DENV infection, which is consistent with a previous publication.<sup>25</sup> Using  
285 a combination of a ZIKV/DENV-2 ratio from VLP- and NS1-MAC-ELISAs, we successfully  
286 differentiated between ZIKV and DENV infection with 90-100% accuracy. Thus, we have demonstrated  
287 a testing algorithm for differentiating ZIKV and DENV infections that can be applied in dengue- and/or  
288 other flavivirus-endemic regions where most patients have had a previous flavivirus infection.

289 Using rigorous evaluation, our study compared the cross-reactivity of anti-prM/E and anti-NS1  
290 antibodies across different sero-complexes, including ZIKV, DENV, WNV and others, by using well-  
291 characterized, archived serum specimens. The overall cross-reactivity of anti-NS1 antibodies induced by  
292 ZIKV infection was significantly lower than anti-prM/E antibodies, possibly due to the difference in  
293 electrostatic surface potential of NS1.<sup>8, 29, 30</sup> However, we did not observe any significant differences in  
294 cross-reactivity between VLP- and NS1-MAC-ELISAs for DENV infection. The results of highly cross-  
295 reactive anti-prM/E antibodies were consistent with the focus-reduction micro-neutralization test

(FR $\mu$ NT) results (Table S3). The majority of ZIKV-infected patients had prior DENV infection as suggested by FR $\mu$ NT titers greater than 10 against DENV-2 in acute serum specimens. During secondary ZIKV infection, the FR $\mu$ NT titer in the convalescent sera showed at least 4-fold increase against both ZIKV and DENV. The majority of cross-reactive anti-prM/E antibodies during flaviviral infection are GR (4G-2 like) antibodies recognizing the FP, with the potential to enhance viral infection and induce low-to-moderate neutralizing activity.<sup>7</sup> The current CDC guideline suggests that a supplemental neutralization test be performed for all specimens positive by a ZIKV MAC-ELISA due to the possibility of antibody cross-reactivity.<sup>20</sup> Our current results further suggest that a 90% FR $\mu$ NT should be performed to distinguish between ZIKV and DENV infection.

Flaviviruses have been traditionally subdivided into different serocomplexes, comprised of members that are cross-neutralized by polyclonal sera.<sup>10</sup> Such sero-classification was correlated with the similarity of amino acid sequence of prM/E.<sup>7</sup> ZIKV, clustered with Spondweni virus and shows an intermediate position with viruses from JEV and DENV serocomplexes in the phylogenetic tree (based on complete genome, E, or NS1 gene sequences). The overall picture of flavivirus serocomplexes indicate that cross-neutralization with polyclonal sera is usually lost when the amino acid sequence divergence of E is more than 50%.<sup>7</sup> Therefore, ZIKV together with the viruses from the Spondweni virus group could form an independent serocomplex, which serves as the basis of using the ratio of ZIKV/DENV IgM antibodies for a differential diagnosis. A similar concept could also be applied to anti-NS1 antibodies, which share a similar amino acid sequence divergence with viruses from different serocomplexes. The use of FP-VLP in this study has several advantages, including the avoidance of a pre-depletion step prior to detecting anti-NS1 antibodies, and the reduced binding of cross-reactive fusion-loop antibodies, which significantly enhance the specificity and accuracy of using a ZIKV/DENV ratio in differentiating ZIKV and DENV infections.

319 Our study revealed a similar percentage of ZIKV acute (69.6% and 69.6%), and convalescent  
320 sera (94.7% and 100%) were positive for both ZIKV-VLP and NS1-MAC-ELISA, respectively.  
321 Previous publications suggested a lower sensitivity of detecting anti-NS1 antibodies, possibly due to  
322 their relatively low abundance compared to anti-prM/E antibody in human sera.<sup>15, 22</sup> Our study showed  
323 that depletion of anti-prM/E antibodies enhances the sensitivity of NS1 antibody detection. Based on the  
324 testing algorithm developed in this study, FP-VLP-MAC-ELISA and NS1-MAC-ELISA had similar  
325 PPV and NPV (Table 2). By combining both assays, the accuracy of sero-diagnosis can reach up to 95%  
326 (57/60) using the classification guideline provided in Table S4. Considering the severe outcome of  
327 congenital Zika syndrome, three false positive specimens (5%), misclassified as ZIKV infections, may  
328 be acceptable (Table S5). The important limitations of the current study is the small sample size of the  
329 validation serum panel and the generalizability to a more complex serum panels such as subjects with  
330 prior exposure to St. Louis Encephalitis virus, Japanese encephalitis virus, Powassan virus, and yellow  
331 fever virus. In summary, the current study successfully develops a novel approach to accurately  
332 differentiate ZIKV and DENV infections for evidence-based public health intervention.

333



## 334 **Role of the funding source**

335       The funding source of this study had no role in the study design, data collection, data analysis,  
336 data interpretation, or writing of the report. The corresponding author had full access to all the data in  
337 the study and had final responsibility for the decision to submit for publication.

338

339

## 340 **Contributors**

341       MTW and BSD performed all the construction of recombinant NS1 and VLP expression plasmids as  
342 well as rabbit serum production. DYC and GJC designed the experiments and wrote the manuscript.  
343 DYC performed all the ELISA and statistical analysis. FAM and JLM characterized all ZIKV and  
344 DENV serum panels. All authors reviewed the draft, had critical input, and reviewed the final  
345 submission.

346

## 347 **Declaration of interests**

348       We declare no competing interests.

349

## 350 **Acknowledgements**

351       DYC was supported by MOST oversea short-term fellowship in CDC to conduct this study. We are  
352 thankful Ann Hunt and Ann Powers for scientific comments and English editing.

353

## 354 **Funding**

355 Portions of this publication was made possible through support provided by the CDC intramural  
356 research fund and the Office of Infectious Disease, Bureau for Global Health, U.S. Agency for  
357 International Development, under the terms of an Interagency Agreement with CDC. The opinions  
358 expressed herein are those of the author(s) and do not necessarily reflect the views of the CDC and U.S.  
359 Agency for International Development.

360

## References

1. Musso D, Rodriguez-Morales A, Levi J, Cao-Lormeau V, Gubler D. Unexpected outbreaks of arbovirus infections: lessons learned from the Pacific and tropical America. *Lancet Infect Dis* pii: **S1473-3099**, 30269-X (2018).
2. Baud D, Gubler D, Schaub B, Lanteri M, Musso D. An update on Zika virus infection. *Lancet* **390**, 2099-2109 (2017).
3. Rasmussen SA, Jamieson DJ, Honein MA, Petersen LR. Zika virus and birth defects - reviewing the evidence for causality. *N Engl J Med* **374**, 1981-1987 (2016).
4. Calvet GA, Santos FBd, Sequeira PC. Zika virus infection: epidemiology, clinical manifestations and diagnosis. *Curr Opin Infect Dis* **29**, 459-466 (2016).
5. Waggoner JJ, Pinsky BA. Zika virus: Diagnostics for an emerging pandemic threat. . *J Clin Microbiol* **54**, 860-867 (2016).
6. Singh R, *et al.* Advances in Diagnosis, Surveillance, and Monitoring of Zika Virus: An Update. *Front Microbiol* **8**, (2018).
7. Heinz FX, Stiasny K. The antigenic structure of Zika virus and its relation to other flaviviruses: Implications for infection and immunoprophylaxis. *Microbiol Mol Biol Rev* **81**, e00055-00016 (2017).

- 384 8. Stettler K, *et al.* Specificity, cross-reactivity, and function of antibodies elicited by Zika virus infection.  
385 *Science* **353**, 823-826 (2016).  
386
- 387 9. Sapparapu G, *et al.* Neutralizing human antibodies prevent Zika virus replication and fetal disease in  
388 mice. *Nature* **540**, 443-447 (2016).  
389
- 390 10. Calisher C, *et al.* Antigenic relationships between flaviviruses as determined by cross-neutralization tests  
391 with polyclonal antisera. *J Gen Virol* **70**, 37-43 (1989).  
392
- 393 11. Priyamvada L, *et al.* Human antibody responses after dengue virus infection are highly cross-reactive to  
394 Zika virus. *Proc Natl Acad Sci U S A* **113**, 7852-7857 (2016).  
395
- 396 12. Robbiani D, *et al.* Recurrent Potent Human Neutralizing Antibodies to Zika Virus in Brazil and Mexico.  
397 *Cell* **169**, 597-609 (2017).  
398
- 399 13. Balmaseda A, *et al.* Antibody-based assay discriminates Zika virus infection from other flaviviruses. *Proc*  
400 *Natl Acad Sci U S A* **114**, 8384-8389 (2017).  
401
- 402 14. Granger D, *et al.* Serologic Testing for Zika Virus: Comparison of Three Zika Virus IgM-Screening Enzyme-  
403 Linked Immunosorbent Assays and Initial Laboratory Experiences. *J Clin Microbiol* **55**, 2127-2136 (2017).  
404
- 405 15. Safronetz D, *et al.* Evaluation of 5 Commercially Available Zika Virus Immunoassays. *Emerg Infect Dis* **23**,  
406 1577-1580 (2017).

407

408 16. Premkumar L, *et al.* Development of Envelope Protein Antigens To Serologically Differentiate Zika Virus  
409 Infection from Dengue Virus Infection. *J Clin Microbiol* **56**, e01504-01517 (2018).

410

411 17. Mishra N, *et al.* Diagnosis of Zika Virus Infection by Peptide Array and Enzyme-Linked Immunosorbent  
412 Assay. *MBio* **9**, e00095-00018 (2018).

413

414 18. Tsai W, *et al.* Distinguishing Secondary Dengue Virus Infection From Zika Virus Infection With Previous  
415 Dengue by a Combination of 3 Simple Serological Tests. *Clin Infect Dis* **65**, 1829-1836 (2017).

416

417 19. Hennessey M, Fischer M, JE. S. Zika Virus Spreads to New Areas - Region of the Americas, May 2015-  
418 January 2016. *MMWR Morb Mortal Wkly Rep* **65**, 55-58 (2016).

419

420 20. Rabe I, *et al.* Interim Guidance for Interpretation of Zika Virus Antibody Test Results. *MMWR Morb*  
421 *Mortal Wkly Rep* **65**, 543-546 (2016).

422

423 21. Bossuyt P, *et al.* STARD 2015: an updated list of essential items for reporting diagnostic accuracy studies.  
424 *BMJ* **351**, h5527 (2015).

425

426 22. Chao D, Galula J, Shen W, Davis B, Chang G. Nonstructural protein 1-specific immunoglobulin M and G  
427 antibody capture enzyme-linked immunosorbent assays in diagnosis of flaviviral infections in humans. *J*  
428 *Clin Microbiol* **53**, 557-566 (2015).

429

- 430 23. Galula J, Chang G, Chuang S, Chao D. Establishment of an Algorithm Using prM/E- and NS1-Specific IgM  
431 Antibody-Capture Enzyme-Linked Immunosorbent Assays in Diagnosis of Japanese Encephalitis Virus and  
432 West Nile Virus Infections in Humans. *J Clin Microbiol* **54**, 412-422 (2016).  
433
- 434 24. Crill W, Hughes H, Delorey M, Chang G. Humoral immune responses of dengue fever patients using  
435 epitope-specific serotype-2 virus-like particle antigens. *PLoS One* **4**, e4991 (2009).  
436
- 437 25. Wong S, *et al.* A Multiplex Microsphere Immunoassay for Zika Virus Diagnosis. *EBioMedicine* **16**, 136-140  
438 (2017).  
439
- 440 26. Huzly D, Hanselmann I, Schmidt-Chanasit J, Panning M. High specificity of a novel Zika virus ELISA in  
441 European patients after exposure to different flaviviruses. *Euro Surveill* **21**, pii=30203 (2016).  
442
- 443 27. Zhang B, *et al.* Diagnosis of Zika virus infection on a nanotechnology platform. *Nat Med* **23**, 548-550  
444 (2017).  
445
- 446 28. Rockstroh A, *et al.* Specific detection of dengue and Zika virus antibodies using envelope proteins with  
447 mutations in the conserved fusion loop. *Emerg Microbes Infect* **6**, e99 (2017).  
448
- 449 29. Brown W, *et al.* Extended surface for membrane association in Zika virus NS1 structure. *Nat Struct Mol*  
450 *Biol* **23**, 865-867 (2016).  
451

- 452 30. Xu X, *et al.* Contribution of intertwined loop to membrane association revealed by Zika virus full-length  
 453 NS1 structure. *EMBO J* **35**, 2170-2178 (2016).

454

455

456

457

Fig 1.

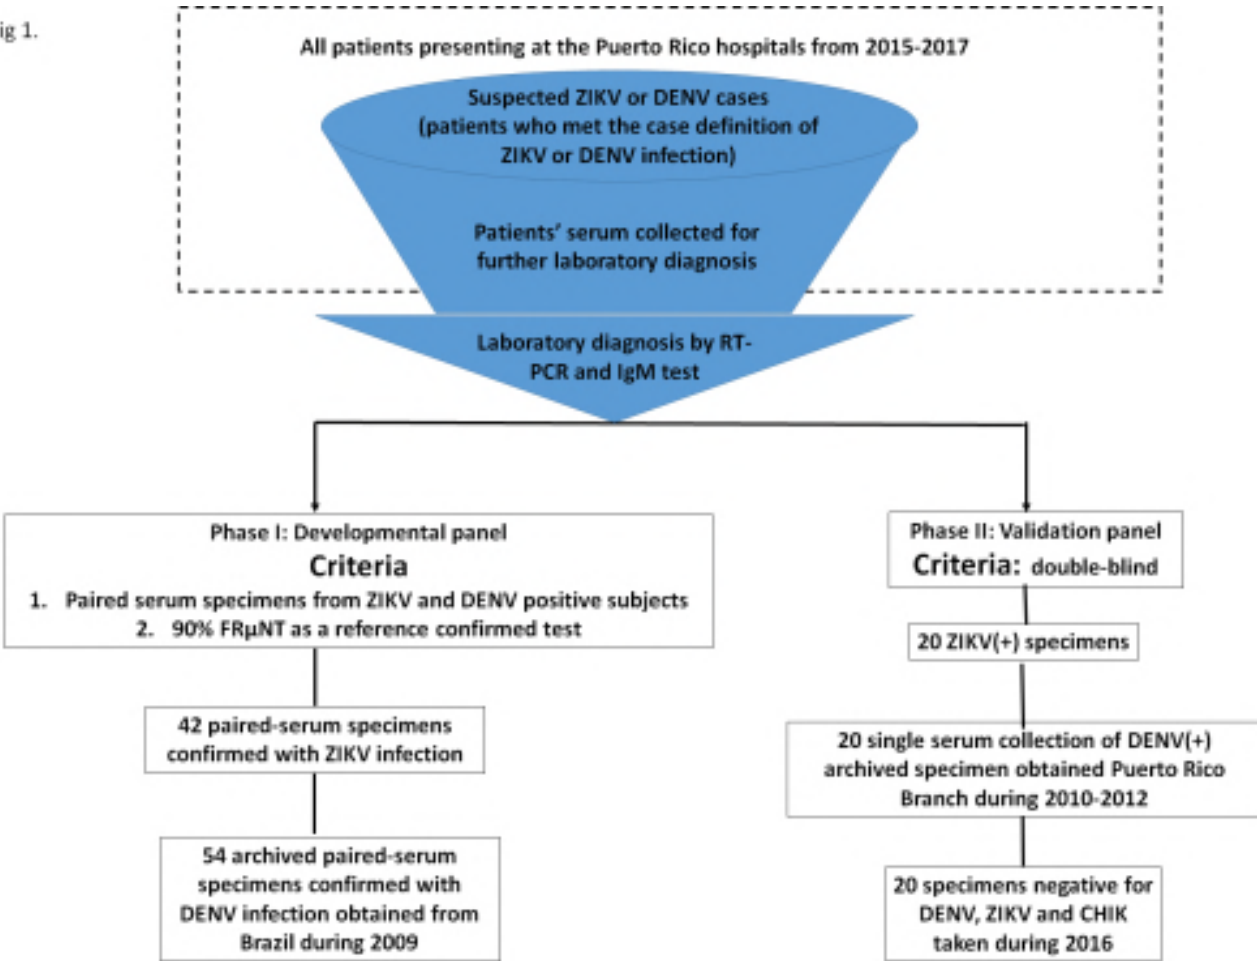

**Fig 1. Flow chart of subject recruitment for the serum panels and case classification during Phase I and II.** The source of ZIKV-infected serum specimens was all participants presenting at the Puerto Rico hospital from 2015-2017. Suspected cases of flavivirus infection were those with clinical symptoms matching the case reporting criteria defined by US-CDC and were admitted to the hospital for further diagnosis. All patients were classified as ZIKV or DENV infection if the results of ZIKV- or DENV-specific RT-PCR confirmed the diagnosis, respectively. Patients who tested negative by either ZIKV- or DENV-specific RT-PCR will be further subjected to an IgM test for the sera collected during a convalescent phase. Only the specimens that were ZIKV-specific RT-PCR positive in the acute phase and had seroconversion of IgM in the convalescent phase were included here. Those without a recorded RT-PCR or IgM laboratory results were excluded. The criteria of all ZIKV and DENV-confirmed



specimens used in Phase I included paired sera collected during the acute and convalescent phase of illness and confirmation of disease status by FRμNT<sub>90</sub> on ZIKV and DENV-2 in order to proper establishment of the cut-off value of the assay. The only criteria for the serum panel used in Phase II was double-blinded. All DENV positive specimens were collected during 2010-2012 during the time the paired specimen from the same patient was rare. The negative specimens were taken during 2016 and they are all negative for DENV, ZIKV, and Chikungunya virus (CHIK) in acute phase and negative for IgM in convalescent samples.

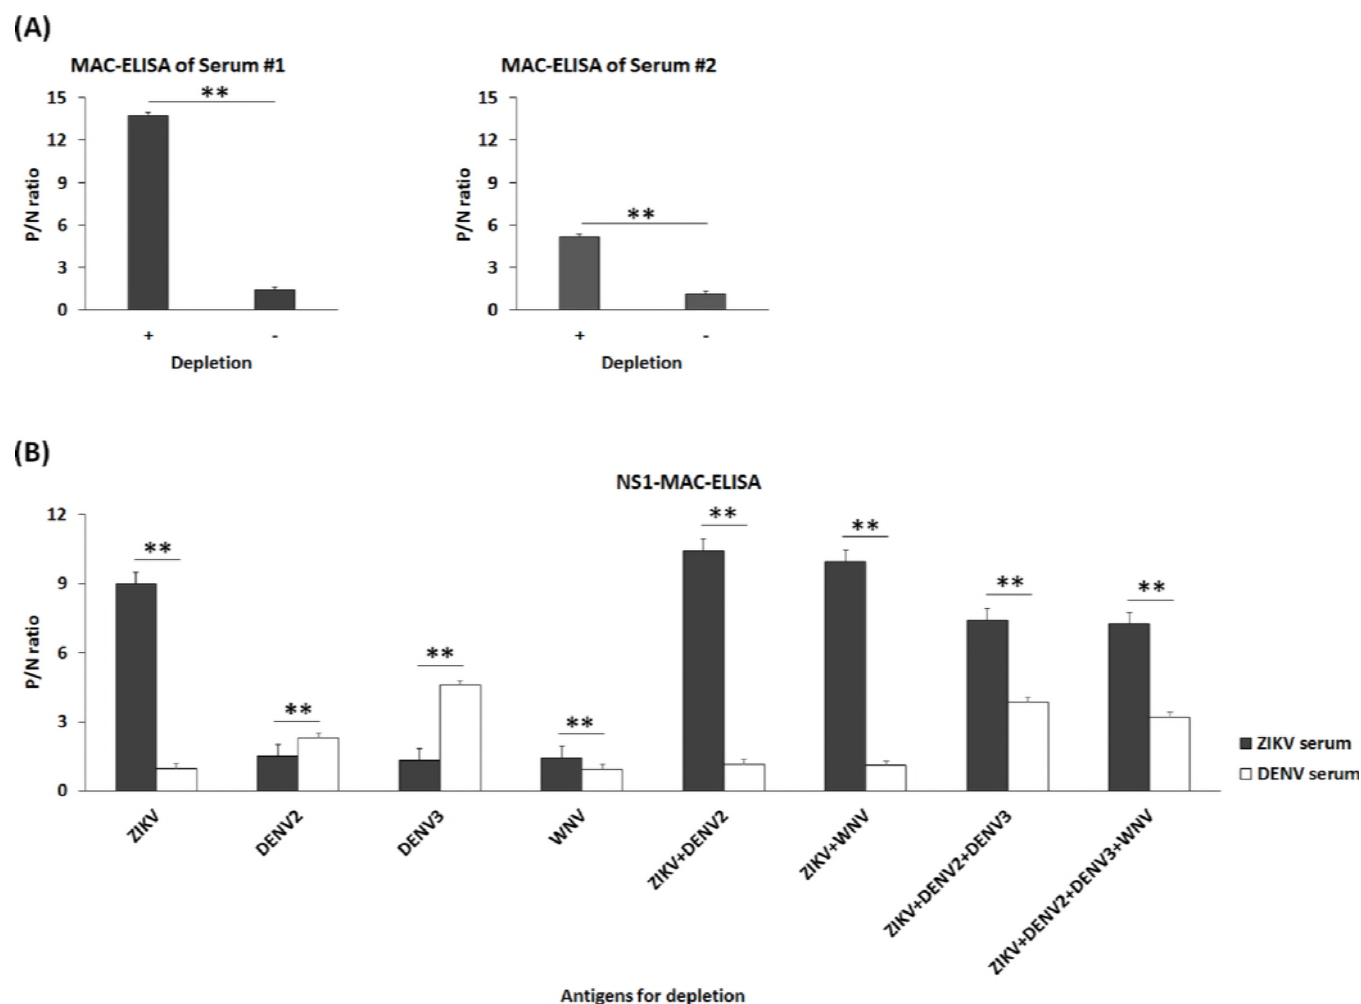

**Fig 2. Analysis of the effect of depletion of anti-prM/E antibodies on NS1-MAC-ELISA using ZIKV VLP alone or in combination with VLPs from DENV-2, DENV-3 and WNV. (A) Values of P/N ratio of IgM and IgG from ZIKV-infected patient serum #1 (primary Zika infection 48B) and #2 (secondary Zika infection 45B) using ZIKV VLP alone for depletion and ZIKV-NS1 antigens for NS1-MAC-ELISA (+ on the x axis indicated with depletion and – indicated without depletion). (B) Values of P/N ratio of IgM and IgG from one ZIKV- (Black bar) or DENV-infected (white bar) patient serum using single, double, triple or quadruple VLP antigens of ZIKV, DENV-2, DENV-3, WNV for depletion. Normal human serum was used as a negative control to calculate the P/N ratio value by dividing the OD450 of ZIKV or DENV-confirmed patient serum with that of negative-control serum.**

489 All data were obtained from three independent experiments, and standard deviations are indicated.

490 \*\*p<0.0001.

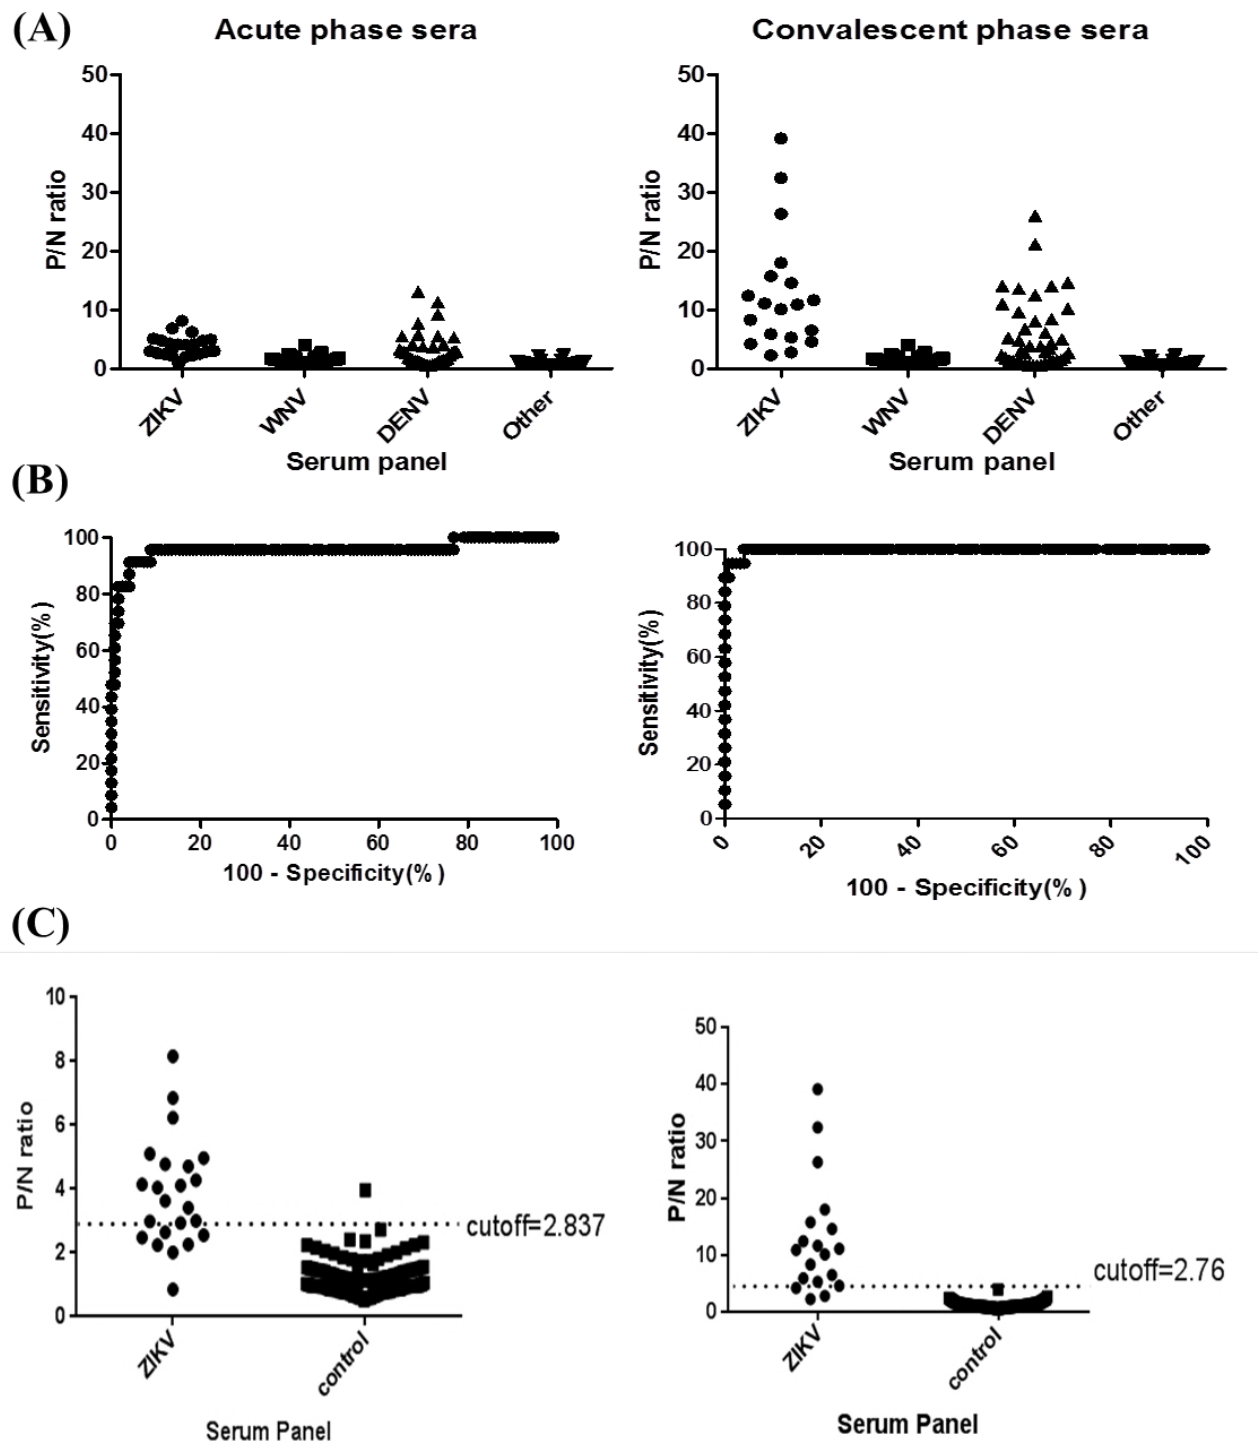

491

492 **Fig 3. Distribution of P/N ratio of four groups of human patient sera and the determination of**  
 493 **optimal cutoff P/N value of ZIKV-VLP-MAC-ELISA from acute (left panel) and convalescent**  
 494 **(right panel) sera. (A) Values of P/N ratio for ZIKV, WNV DENV and other serum specimens. (B)**  
 495 **The plot of sensitivity versus 100-specificity based on P/N values from 42 ZIKV-confirmed sera and**

496 173 control serum panel. (C) Optimal cutoff value was determined by the magnitude of likelihood ratio  
497 positive (LR+) calculated by dividing sensitivity by 100-specificity.

498

499

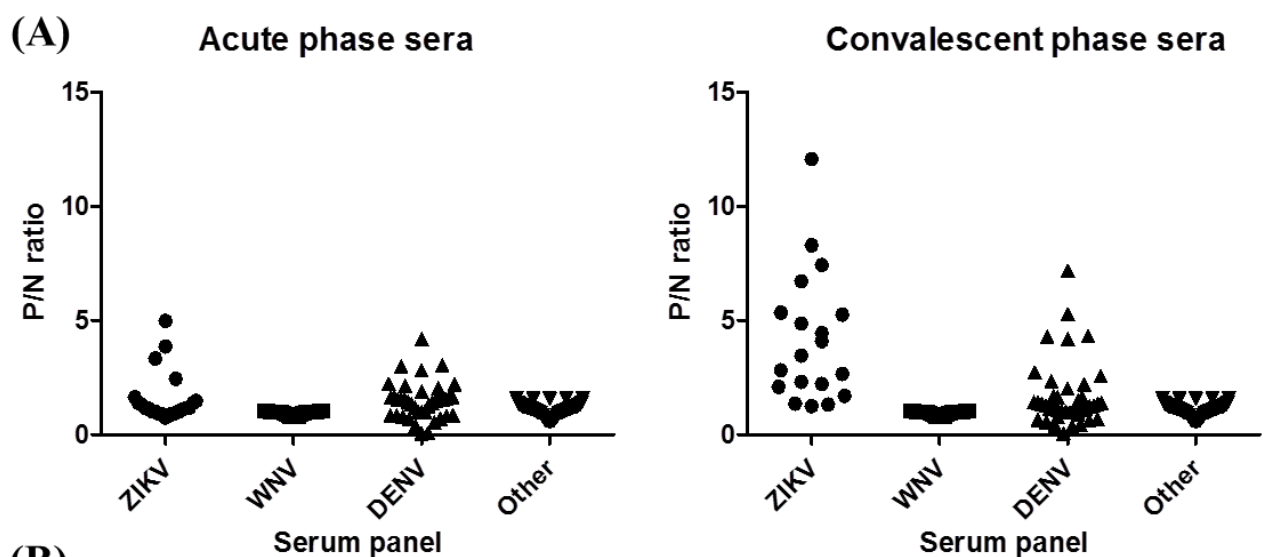

**(B)**

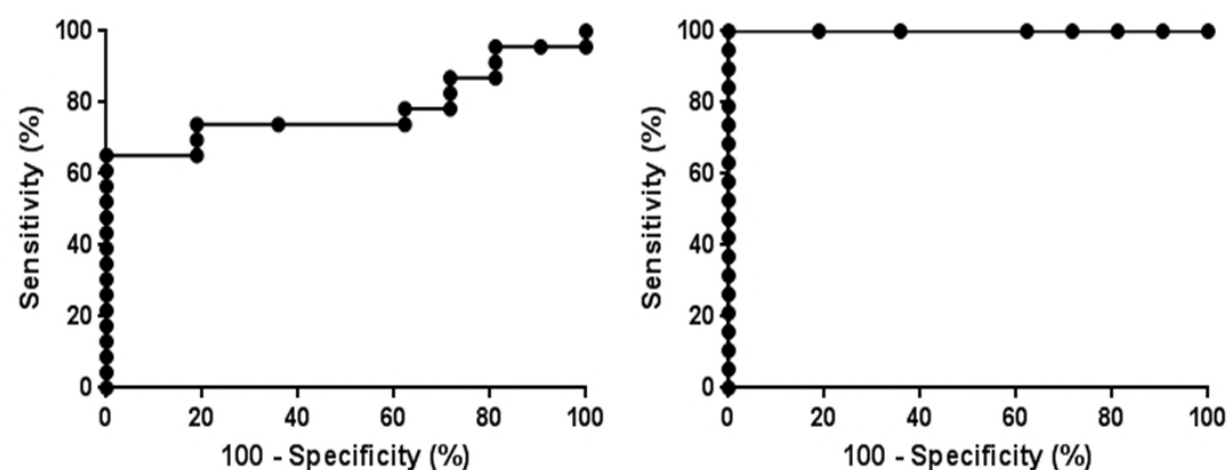

**(C)**

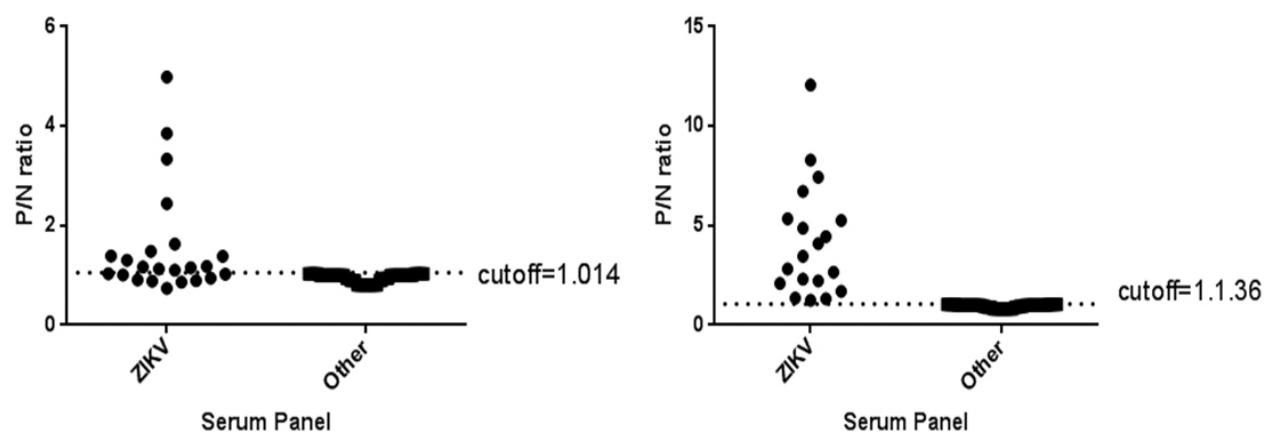

501 **Fig 4. Distribution of P/N ratio of four groups of human patient sera and the determination of**  
502 **optimal cutoff P/N value of ZIKV-NS1-MAC-ELISA from acute (left panel) and convalescent**  
503 **(right panel) sera.** (A) Values of P/N ratio for ZIKV, WNV DENV and other serum specimens. (B)  
504 The plot of sensitivity versus 100-specificity based on P/N values from 42 ZIKV-confirmed sera and  
505 173 control serum panel. (C) Optimal cutoff value was determined by the magnitude of likelihood ratio  
506 positive (LR+) calculated by dividing sensitivity by 100-specificity.

507

508

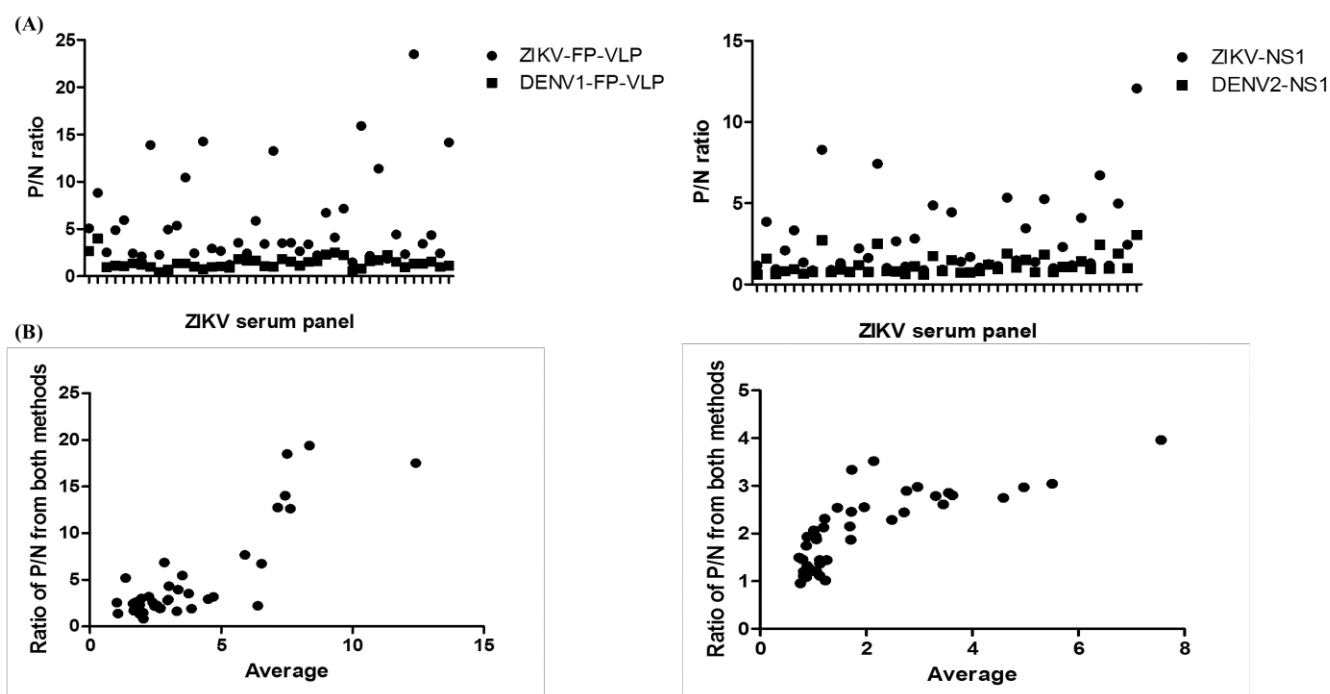

**Fig 5. P/N values (A) and Blant-Altman plots (B) of FP-VLP- and NS1-MAC-ELISA from 42 ZIKV-patient's serum specimens**



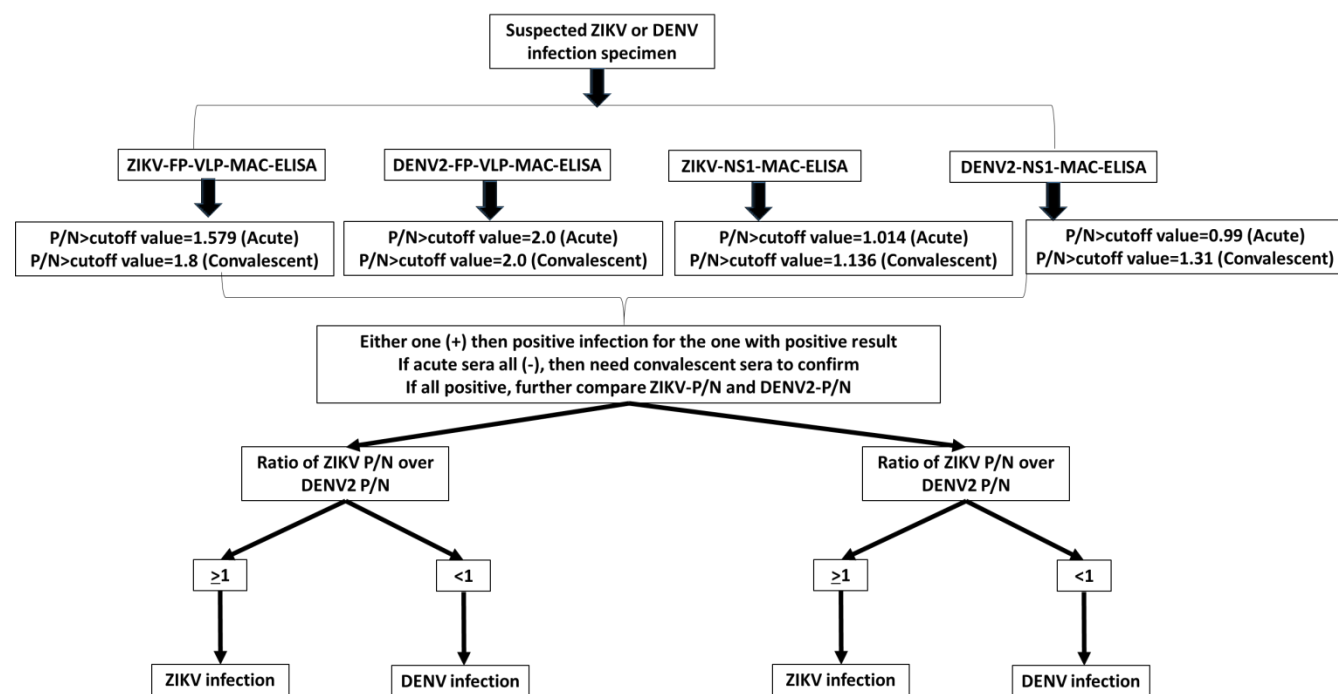

**Fig 6. Algorithm of differentiating ZIKV and DENV infection by VLP-MAC-ELISA and NS1-MAC-ELISA**

517 **Table 1. Characteristics of serum panels used in this study**

| Serum Panel          | No of<br>specimens | Single/paired <sup>#</sup> | RT-PCR           | 90%FRμNT        | Country           | Year |
|----------------------|--------------------|----------------------------|------------------|-----------------|-------------------|------|
| <b>Testing panel</b> |                    |                            |                  |                 |                   |      |
| ZIKV                 | 42                 | Paired                     | (+)              | 4-fold increase | Puerto Rico       | 2016 |
| DENV                 | 54                 | Paired                     | (+)              | 4-fold increase | Brazil            | 2009 |
| WNV                  | 97                 | Single                     | n/d <sup>^</sup> | Highest titer   | South Dakota, USA | 2008 |
| Other*               | 76                 | Single                     |                  |                 |                   |      |

518 # paired specimens including acute specimens collected within 7 days of disease onset and convalescent phase specimens were collected within 7-30 days after onset of  
519 symptoms

520 \*A control serum panel including thirty non-DENV patient serum specimens, IgG-positive yellow fever-17D (YF-17D) post-vaccination sera (n=10), acute serum  
521 specimens from St. Louis encephalitis virus (SLEV) (n=2), chikungunya virus (n=10), or other non-arboviral (n=8) infections, as well as forty-six normal human sera  
522 from the CDC blood bank.

523 <sup>^</sup>n/d: not determined due to undetectable viremia

524

525     **Table 2. Cross-reactivity of antibodies from four groups of human patient serum specimens against ZIKV and DENV-2 VLP and NS1 antigens**

| Serum panel |                  | ZIKV-VLP-<br>MAC-ELISA | ZIKV-NS1-<br>MAC-ELISA | DENV2-VLP-<br>MAC-ELISA <sup>+</sup> | DENV2-NS1-<br>MAC-ELISA* |
|-------------|------------------|------------------------|------------------------|--------------------------------------|--------------------------|
| ZIKV (21)   |                  | 21/21(100%)            | 21/21(100%)            | 20/21(95.2%)*                        | 12/21(57.1%)*            |
|             | Acute (23)       | 16/23(69.6%)           | 16/23(69.6%)           | 22/23(95.7%)**                       | 2/23 (8.7%)**            |
|             | Convalescent(19) | 18/19(94.7%)           | 19/19(100%)            | 19/19(100%***                        | 10/19(52.6%***           |
| WNV (56)    |                  | 2/56 (3.6%)            | 0/56 (0%)              | NA                                   | NA                       |
| DENV (44)   |                  | 28/44(63.6%)           | 32/44(72.7%)           | 42/44(95.5%)                         | 40/44(90.9%)             |
|             | Acute (40)       | 17/40(42.5%)           | 25/40(62.5%)           | 26/40(65.0%)                         | 23/40(57.5%)             |
|             | Convalescent(42) | 23/42(54.8%)           | 24/42(57.1%)           | 40/42(95.2%)                         | 38/42(90.5%)             |
| Other(76)   |                  | 0/76 (0%)              | 0/76 (0%)              | 0/76 (0%)                            | 2/76 (2.6%)              |

526     NA: not available

527     <sup>+</sup>The cutoff of DENV-2 VLP or NS1-MAC-ELISA was based on our previous publication (??).

528     \*P=0.0042 with significance level at 0.05

529     \*\*p<0.0001 with significance level at 0.05

530     \*\*\*p=0.0007 with significance level at 0.05
